# Supplementary material
Source: PubMed Central journal article supplement (PMC3195380)

## Supplemental data

**Supplemental Figure S1. Ssd1<sup>1-450</sup>-NLS $\Delta$  fails to localize to the nucleus.** Images of three cells expressing Ssd1<sup>1-450</sup>-NLS $\Delta$ -GFP and Pap1-RFP (FLY3365 + FLE1211) captured by spinning disk confocal fluorescence microscopy. Left panels: bright field images, middle panel: merged optical sections of GFP and RFP fluorescence (21 x 0.2um sections); right panels: 3-D models of image data generated by Volocity software. The 3-D models reveal that the Ssd1<sup>1-450</sup>-NLS $\Delta$  puncta are extra-nuclear or perinuclear in localization. Scale bar = 4 um. The bottom cell is also depicted in **Fig. 3B**.

**Supplemental Figure S2. SRL1 mRNA localization is aberrant in Ssd1-NLS $\Delta$  and Ssd1-RBD $\Delta$  cells.** *SRL1* mRNA localization was analyzed in budded cells, as previously described (Kurischko et al., 2011). Cells (FLY3196) expressing wild type Ssd1 (*SSD1*; FLE1083), Ssd1-NLS $\Delta$  (*SSD1-NLS $\Delta$ -TAP*; FLE1277), Ssd1-RBD $\Delta$  (*SSD1-RBD $\Delta$ -TAP*; FLE1276) and empty vector (*ssd1 $\Delta$* ; pRS415) exhibited 5 general patterns of *SRL1* mRNA localization, as depicted in the graph. These include cells with no *SRL1* mRNA spots (no spots), multiple faint spots, and 1-3 bright spots restricted to the mother (M), bud (D) or both mother and bud (M+D). The data for the wild type *SSD1* and empty vector controls are from previously published experiments (Kurischko et al., 2011).

**Supplemental Figure S3. C-terminal truncated Ssd1-GFP partially co-localizes with P-bodies in *cbk1 $\Delta$*  cells.** Physiologically expressed Ssd1<sup>1-570</sup>, Ssd1<sup>1-670</sup>, Ssd1<sup>1-1014</sup> and Ssd1<sup>1-1170</sup> were monitored in *cbk1 $\Delta$*  cells that co-express Edc3-RFP. Some cytoplasmic Ssd1 puncta co-localize with P-body protein Edc3, see arrowheads (26.2%

for Ssd1<sup>1-570</sup>, 45.9% for Ssd1<sup>1-670</sup>, 30.3% for Ssd1<sup>1-1014</sup> and 17.6% for Ssd1<sup>1-1170</sup> cells; n=100-300 cells for each). The strains used in these experiments were FLY3206, FLY3210, FLY3313 and FLY3316. All cells were monitored by spinning disk fluorescence microscopy and each image represents a single optical section. Scale bar = 8  $\mu$ m.

**Supplemental movie 1. 3-D model of cells expressing Ssd1<sup>1-450</sup>-NLS $\Delta$  puncta.** The movie was generated from the upper 3-D model in **Supplemental Fig. S1** and demonstrates that the Ssd1<sup>1-450</sup>-NLS $\Delta$  puncta are extra-nuclear. 3-D projections and movie were generated by Volocity software.

**Supplemental Table 1. Nuclear-cytoplasmic ratios of C-terminal truncated Ssd1.**

Data were obtained by measuring the average Ssd1-GFP signal in the nucleus and cytoplasm, as described in the Material and Methods. Cells with large vacuoles were not taken in consideration. The data represent N (nucleus), C (cytoplasm), B (background), N-B, C-B, ratio N-B/C-B, number of nuclei (observations), median, mean, standard deviation, p values for pair wise comparisons of ratios between mutants and wild type.

# Supplemental Figure 1

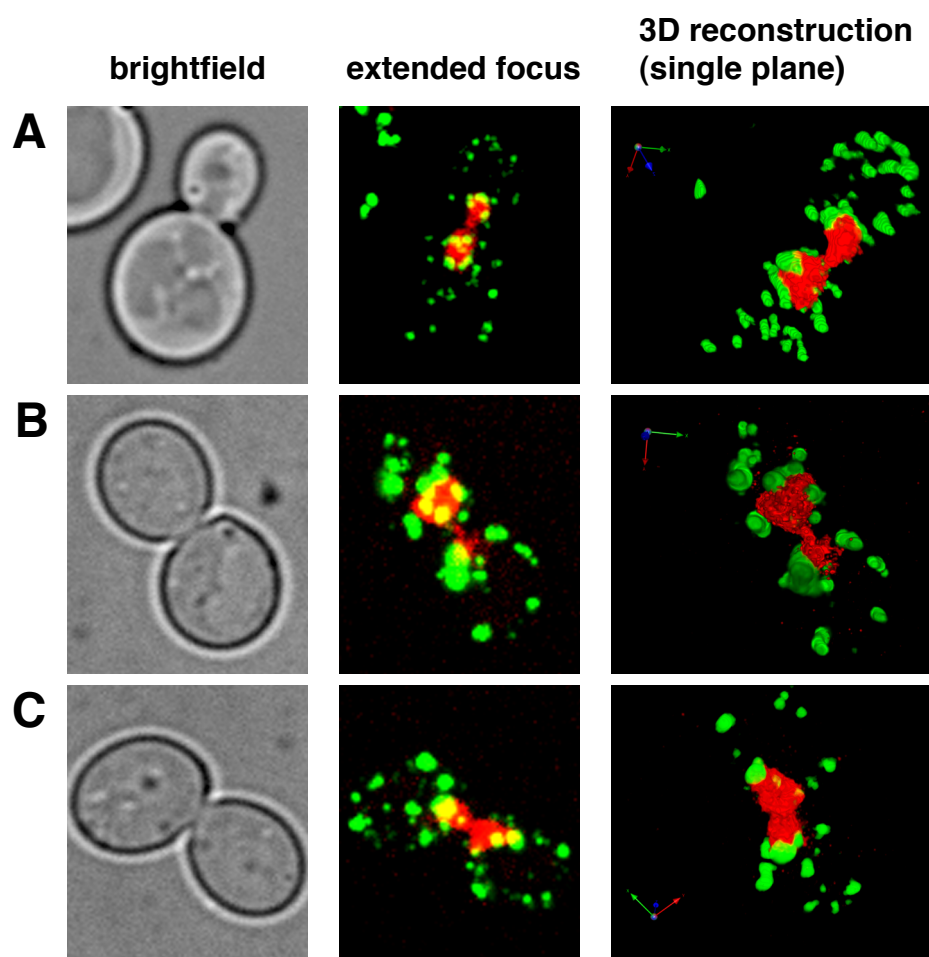

## Supplemental Figure 2

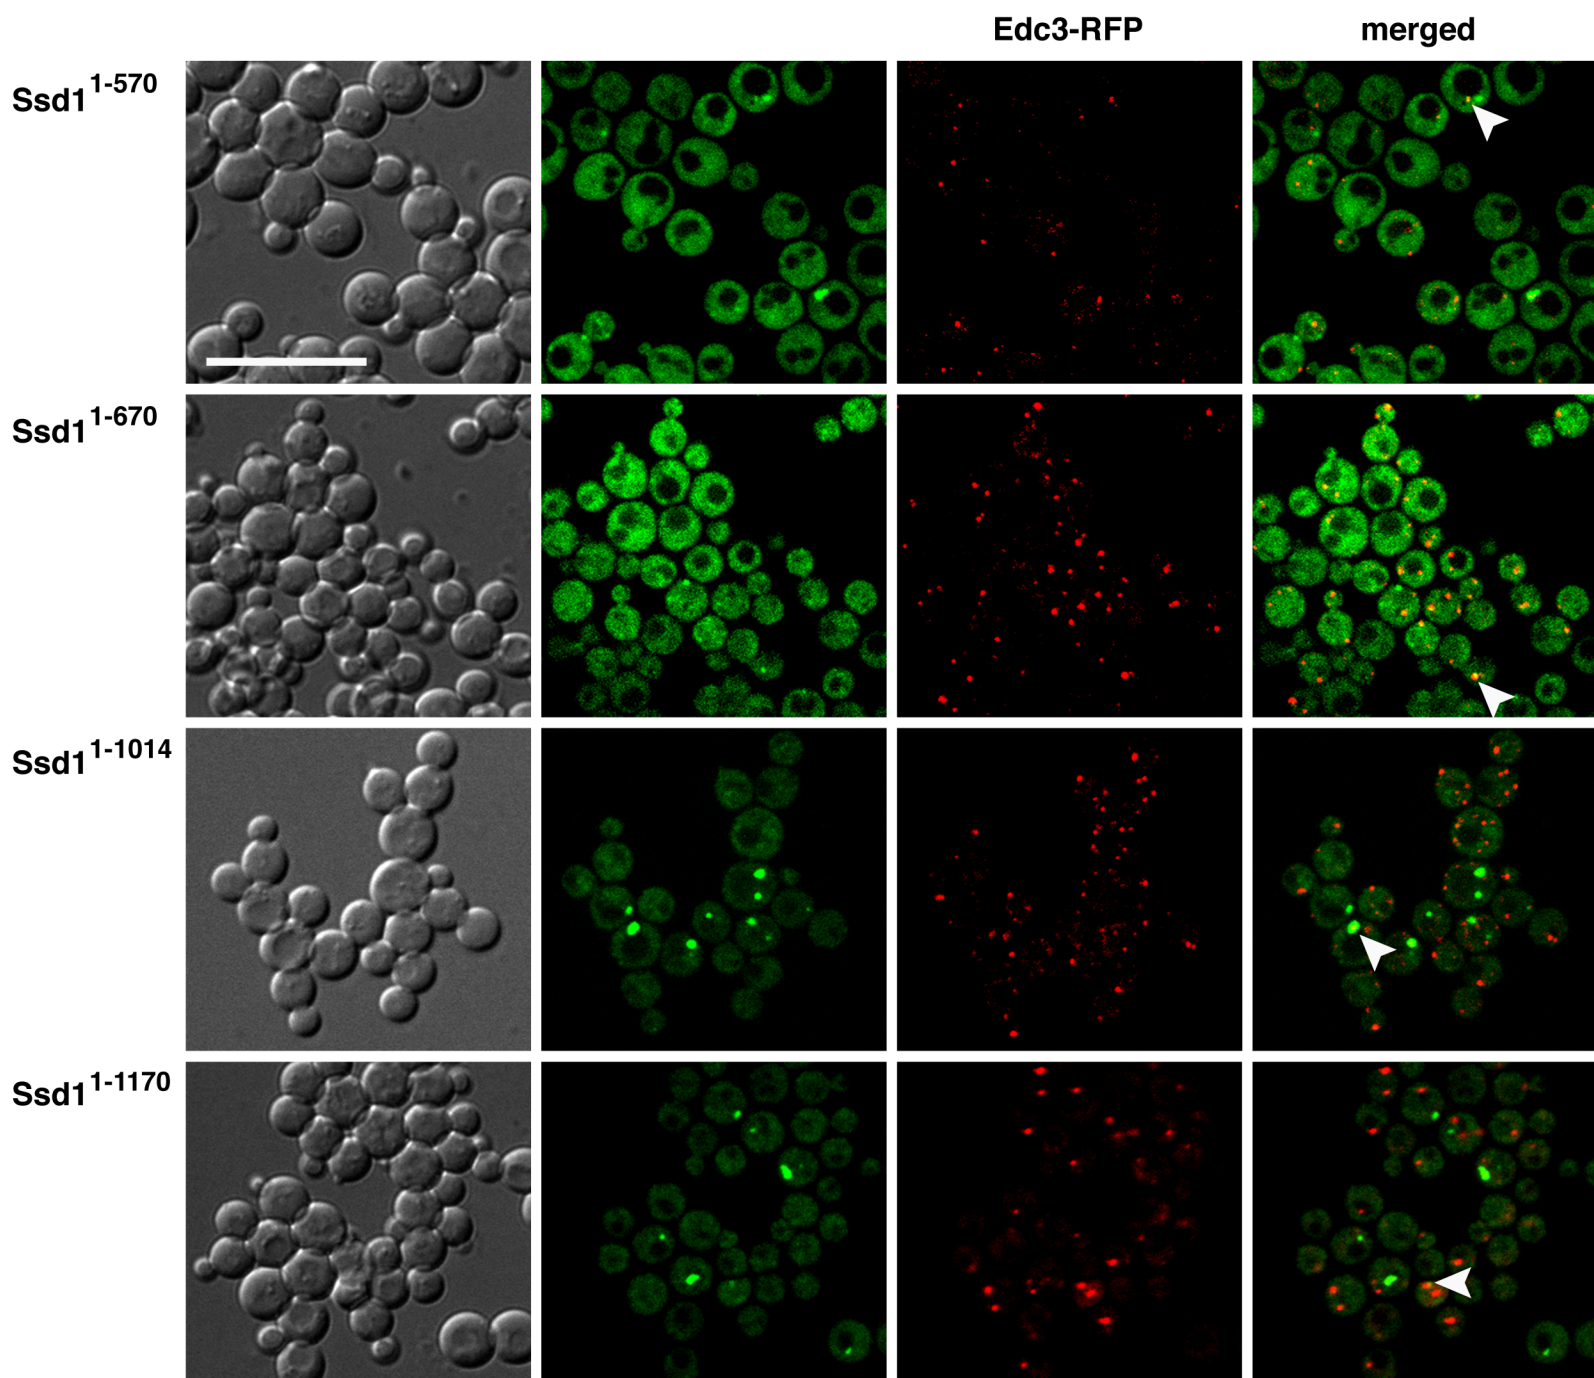

# Supplemental Figure S3

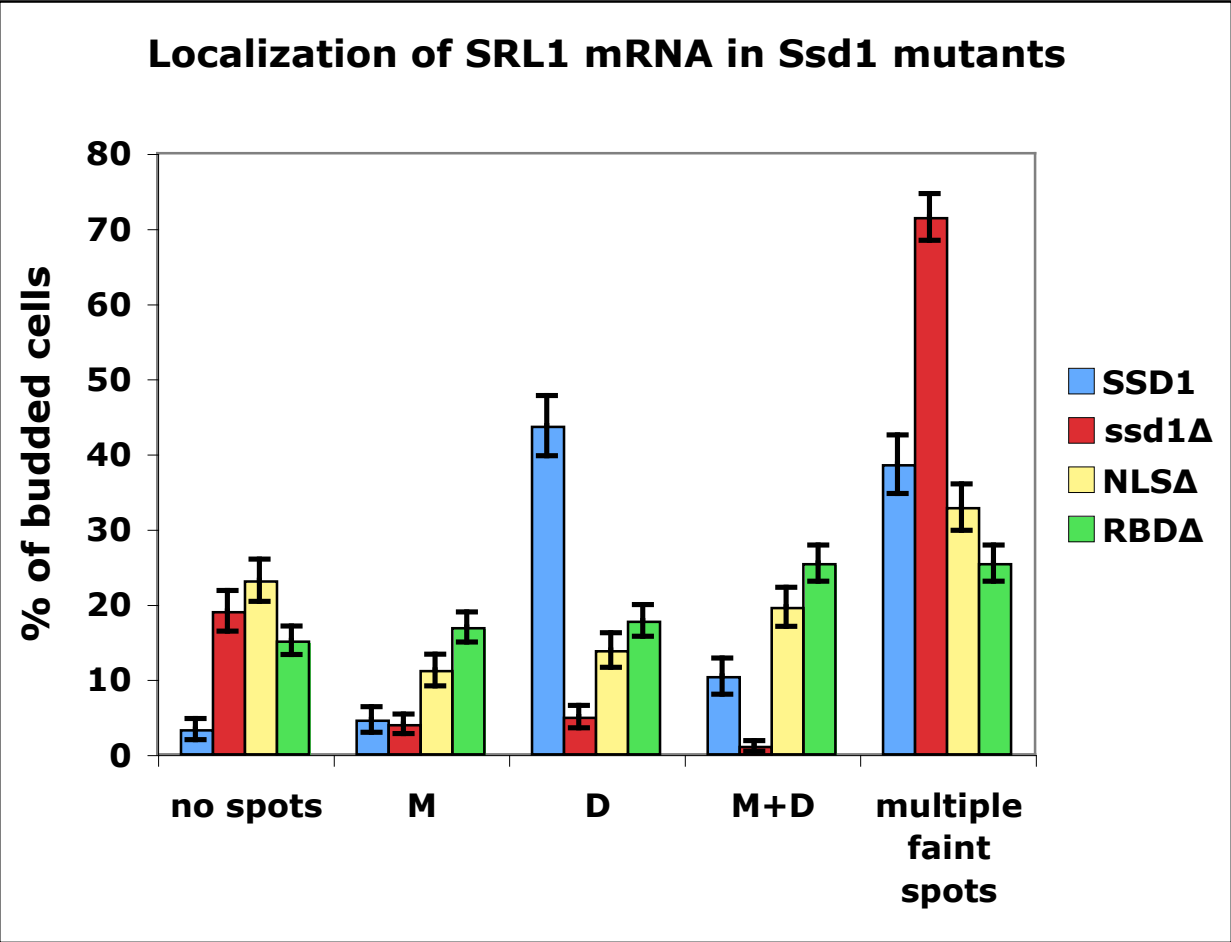

Supplement: NIHMS324833-supplement-Supp_Figure_S1-S3_Table_S1.pdf [file NIHMS324833-supplement-Supp_Figure_S1-S3_Table_S1.pdf]
